# Supplementary material for: The target of the DEAH-box NTP triphosphatase Prp43 in Saccharomyces cerevisiae spliceosomes is the U2 snRNP-intron interaction
Source: eLife journal article supplement (doi:10.7554/elife.15564), 2016-04-26
Supplement: supp [file elife_poa_e15564_Figure_6_source_data_1a_and_b.docx]

| **Prp43_**  **Ntr1GP**  **Residues** | **Protein 2**  **Residues** | **Experiment 1** | | **Experiment 2** | | **Experiment 3** | |
| --- | --- | --- | --- | --- | --- | --- | --- |
| **Spectra count** | **Max score** | **Spectra count** | **Max score** | **Spectra count** | **Max score** |
| **U2 snRNP proteins** | | | | | | | |
|  | **Hsh155** |  |  |  |  |  |  |
| 734 | 325 | 1 | 2.14 |  |  | 1 | 0.92 |
| 745 | 612 |  |  | 2 | 4.21 |  |  |
| 747 | 237 | 1 | 3.39 | 1 | 3.86 |  |  |
| 747 | 612 |  |  | 3 | 5.78 |  |  |
| 778 | 237 | 3 | 5.71 | 1 | 4.03 |  |  |
|  | **Cus1** |  |  |  |  |  |  |
| 747 | 102 |  |  |  |  | 1 | 1.56 |
| 755 | 102 | 4 | 3.67 |  |  |  |  |
| 768 | 48 |  |  |  |  | 1 | 1.42 |
| **NTC proteins** | | | | | | | |
|  | **Clf1** |  |  |  |  |  |  |
| 764 | 668 | 4 | 8.03 |  |  |  |  |
| **RES complex proteins** | | | | | | | |
|  | **Bud13** |  |  |  |  |  |  |
| 323 | 151 |  |  | 1 | 2.03 |  |  |
|  | **Pml1** |  |  |  |  |  |  |
| 669 | 6 |  |  | 1 | 3.33 |  |  |
| **Known splicing proteins** | | | | | | | |
|  | **Cwc21** |  |  |  |  |  |  |
| 52 | 98 | 3 | 8.67 |  |  |  |  |
| 755 | 48 | 1 | 3.74 |  |  |  |  |
|  | **Cwc22** |  |  |  |  |  |  |
| 602 | 530 | 1 | 4.71 |  |  |  |  |
|  | **Prp17** |  |  |  |  |  |  |
| 758 | 375 | 4 | 1.38 |  |  |  |  |

Figure 6-source data 1a

| **Prp43_**  **Ntr1GP Residue 1** | **Prp43_**  **Ntr1GP Residue 2** | **Experiment 1** | | **Experiment 2** | | **Experiment 3** | |
| --- | --- | --- | --- | --- | --- | --- | --- |
| **Spectra count** | **Max score** | **Spectra count** | **Max score** | **Spectra count** | **Max score** |
| 52 | 66 |  |  | 4 | 9.29 |  |  |
| 52 | 71 | 1 | 0.80 |  |  |  |  |
| 66 | 89 |  |  | 1 | 1.01 |  |  |
| 71 | 89 | 10 | 9.51 | 5 | 8.27 |  |  |
| 168 | 182 | 1 | 6.18 | 2 | 2.75 |  |  |
| 237 | 800 | 4 | 5.70 |  |  |  |  |
| 644 | 651 | 5 | 11.71 | 2 | 11.58 | 3 | 7.09 |
| 644 | 745 |  |  | 1 | 1.60 |  |  |
| 644 | 747 | 1 | 2.17 |  |  | 2 | 1.49 |
| 644 | 755 | 10 | 4.63 | 5 | 4.03 |  |  |
| 651 | 755 |  |  | 8 | 7.57 | 1 | 0.28 |
| 663 | 747 |  |  | 4 | 10.92 |  |  |
| 734 | 747 | 9 | 7.07 |  |  | 2 | 1.39 |
| 734 | 764 | 1 | 1.85 |  |  |  |  |
| 734 | 768 | 1 | 4.21 |  |  |  |  |
| 734 | 778 | 24 | 10.70 | 3 | 6.88 | 7 | 6.86 |
| 738 | 745 |  |  | 1 | 3.29 |  |  |
| 738 | 747 |  |  | 9 | 6.90 |  |  |
| 738 | 755 |  |  | 3 | 7.17 |  |  |
| 738 | 764 |  |  | 4 | 5.06 |  |  |
| 738 | 768 | 4 | 6.16 | 6 | 7.21 | 1 | 1.57 |
| 738 | 778 | 19 | 12.14 | 10 | 10.59 | 6 | 6.04 |
| 745 | 755 | 3 | 3.34 | 4 | 5.35 | 2 | 1.67 |
| 747 | 755 | 15 | 10.94 | 18 | 10.55 | 6 | 4.21 |
| 747 | 778 | 12 | 10.02 | 5 | 4.43 | 6 | 2.03 |
| 755 | 764 |  |  | 1 | 3.39 |  |  |
| 755 | 778 |  |  | 4 | 4.24 |  |  |
| 764 | 768 | 2 | 3.91 | 3 | 4.05 |  |  |
| 764 | 775 |  |  | 1 | 6.32 |  |  |
| 764 | 778 |  |  | 2 | 3.90 |  |  |
| 768 | 778 | 10 | 11.37 | 6 | 9.53 | 4 | 4.59 |
| 768 | 785 |  |  | 4 | 6.90 |  |  |
| 768 | 796 |  |  | 2 | 13.91 |  |  |
| 775 | 785 |  |  | 1 | 2.27 |  |  |

Figure 6-source data 1b
